# Supplementary material for: Ovarian Transcriptomic Analyses in the Urban Human Health Pest, the Western Black Widow Spider
Source: Genes (Basel). 2020 Jan 12;11(1):87. doi: 10.3390/genes11010087 (PMC7017306; doi:10.3390/genes11010087)
Supplement: Supplementary file 1 [file genes-11-00087-s001.xlsx]

## Sheet: Table S1. GO terms
	Table S1: GO terms and the number of L. hesperus ovarian transcripts per GO category
		GO category
	GO terms	Biological Process	Cellular Component	Molecular Function
	1	53077	32376	33400
	2	153877	15746	53100
	3	202034	59657	117032
	4	267938	76622	90887
	5	296470	49322	80989
	6	223675	36757	62209
	7	158959	20658	40282
	8	116160	19394	20162
	9	94482	11877	14083
	10	67048	5798	4962
	11	41415	1769	1715
	12	26534	375	494
	13	14339	71	22
	14	6432	0	0
	15	2926	0	0

## Sheet: Table S2. KEGG pathway
Table S2: KEGG pathway annotations for L. hesperus ovarian transcriptome
Pathway	#Enzs in Pathway	# sequences	Pathway ID	Enzyme
Purine metabolism	77	1846	map00230	ec:3.6.1.15 - phosphatase, ec:4.6.1.2 - cyclase, ec:3.1.4.35 - phosphodiesterase, ec:3.6.1.9 - diphosphatase, ec:2.4.2.15 - phosphorylase, ec:1.17.4.1 - reductase, ec:3.1.4.17 - phosphodiesterase, ec:1.7.1.7 - reductase, ec:2.7.4.10 - kinase, ec:3.2.2.4 - nucleosidase, ec:6.3.3.1 - cyclo-ligase, ec:1.7.3.3 - urate hydroxylase, ec:3.6.1.5 - ATP-diphosphatase, ec:3.1.3.5 - uridine 5'-nucleotidase, …
Thiamine metabolism	15	1587	map00730	ec:3.6.1.15 - phosphatase, ec:2.7.4.7 - kinase, ec:2.8.1.7 - desulfurase, ec:2.7.6.2 - diphosphokinase, ec:2.7.1.50 - kinase, ec:2.7.4.3 - kinase, ec:3.1.3.1 - phosphatase, ec:2.7.1.49 - kinase, ec:1.4.3.19 - oxidase, ec:3.5.99.2 - aminohydrolase, ec:2.5.1.3 - phosphate synthase, ec:3.1.3.2 - phosphatase, ec:4.1.99.19 - synthase, ec:2.2.1.7 - synthase, ec:2.7.4.16 - kinase
Biosynthesis of antibiotics	206	704	map01130	ec:2.7.4.2 - kinase, ec:4.1.1.32 - carboxykinase (GTP), ec:1.2.1.3 - dehydrogenase (NAD+), ec:5.1.3.1 - 3-epimerase, ec:4.1.1.49 - carboxykinase (ATP), ec:2.7.1.31 - 3-kinase, ec:4.1.1.48 - synthase, ec:2.3.1.12 - acetyltransferase, ec:1.4.1.14 - synthase (NADH), ec:2.6.1.66 - transaminase, ec:2.7.7.64 - uridylyltransferase, ec:1.2.1.11 - dehydrogenase, ec:2.7.2.3 - kinase, ec:1.2.4.2 - dehydroge…
Drug metabolism - other enzymes	22	525	map00983	ec:2.7.1.48 - kinase, ec:3.5.2.2 - hydantoinase, ec:3.1.1.1 - ali-esterase, ec:1.17.4.1 - reductase, ec:1.3.1.2 - dehydrogenase (NADP+), ec:3.5.1.6 - N-carbamoyl-beta-alanine amidohydrolase, ec:3.2.1.31 - beta-glucuronide glucuronohydrolase glucuronidase, ec:3.5.4.5 - deaminase, ec:2.4.2.3 - phosphorylase, ec:1.17.3.2 - oxidase, ec:2.7.4.14 - kinase, ec:1.1.1.205 - dehydrogenase, ec:2.4.2.4 - pho…
Fatty acid degradation	22	266	map00071	ec:1.2.1.3 - dehydrogenase (NAD+), ec:6.2.1.3 - ligase, ec:1.2.5.2 - dehydrogenase (quinone), ec:5.1.2.3 - epimerase, ec:1.3.3.6 - oxidase, ec:5.3.3.8 - isomerase, ec:2.3.1.16 - C-acyltransferase, ec:1.14.14.1 - monooxygenase, ec:2.3.1.21 - O-palmitoyltransferase, ec:1.3.8.1 - acyl-CoA dehydrogenase, ec:1.1.1.1 - dehydrogenase, ec:1.3.8.8 - acyl-CoA dehydrogenase, ec:1.1.1.35 - dehydrogenase, ec:…
Drug metabolism - cytochrome P450	7	250	map00982	ec:1.14.14.1 - monooxygenase, ec:1.1.1.1 - dehydrogenase, ec:1.2.1.5 - dehydrogenase [NAD(P)+], ec:1.2.3.1 - oxidase, ec:2.4.1.17 - 1-naphthol glucuronyltransferase, ec:1.14.13.8 - monooxygenase, ec:2.5.1.18 - transferase
Tryptophan metabolism	30	247	map00380	ec:3.5.1.9 - kynurenine formamidase, ec:1.2.1.3 - dehydrogenase (NAD+), ec:1.14.16.4 - 5-monooxygenase, ec:1.2.4.2 - dehydrogenase (succinyl-transferring), ec:1.13.11.11 - 2,3-dioxygenase, ec:4.1.1.45 - decarboxylase, ec:1.13.11.6 - 3,4-dioxygenase, ec:1.14.13.9 - 3-monooxygenase, ec:4.1.1.28 - decarboxylase, ec:1.14.14.1 - monooxygenase, ec:3.5.99.5 - deaminase, ec:1.4.3.2 - oxidase, ec:4.1.99.1…
Metabolism of xenobiotics by cytochrome P450	9	243	map00980	ec:1.3.1.20 - dehydrogenase, ec:1.14.14.1 - monooxygenase, ec:2.8.2.14 - sulfotransferase, ec:1.1.1.1 - dehydrogenase, ec:1.1.1.184 - reductase (NADPH), ec:1.2.1.5 - dehydrogenase [NAD(P)+], ec:3.3.2.9 - epoxide hydrolase, ec:2.4.1.17 - 1-naphthol glucuronyltransferase, ec:2.5.1.18 - transferase
Glycerolipid metabolism	24	236	map00561	ec:2.3.1.20 - O-acyltransferase, ec:1.2.1.3 - dehydrogenase (NAD+), ec:2.7.1.31 - 3-kinase, ec:2.3.1.51 - O-acyltransferase, ec:2.7.7.9 - uridylyltransferase, ec:1.1.1.21 - reductase, ec:3.2.1.22 - melibiase, ec:2.7.1.107 - kinase (ATP), ec:2.7.1.121 - phosphotransferase, ec:3.1.1.23 - lipase, ec:2.3.1.22 - O-acyltransferase, ec:2.7.8.20 - glycerophosphotransferase, ec:3.1.3.21 - alpha-glyceropho…
T cell receptor signaling pathway	2	212	map04660	ec:2.7.10.2 - protein-tyrosine kinase, ec:3.1.3.16 - phosphatase
Caffeine metabolism	4	209	map00232	ec:1.7.3.3 - urate hydroxylase, ec:1.14.14.1 - monooxygenase, ec:1.17.3.2 - oxidase, ec:2.3.1.5 - N-acetyltransferase
Steroid hormone biosynthesis	17	204	map00140	ec:5.3.3.1 - Delta-isomerase, ec:1.1.1.51 - 17)beta-hydroxysteroid dehydrogenase, ec:1.14.14.1 - monooxygenase, ec:1.1.1.64 - 17beta-dehydrogenase (NADP+), ec:1.1.1.239 - dehydrogenase (NAD+), ec:1.3.1.3 - 5beta-reductase, ec:1.14.14.19 - 17alpha-monooxygenase, ec:2.8.2.4 - sulfotransferase, ec:2.8.2.15 - sulfotransferase, ec:1.1.1.145 - dehydrogenase, ec:3.1.6.2 - arylsulfatase, ec:3.1.6.1 - sul…
Glycerophospholipid metabolism	40	189	map00564	ec:3.1.4.4 - D, ec:2.3.1.51 - O-acyltransferase, ec:2.7.8.5 - 1-phosphatidyltransferase, ec:2.3.1.42 - O-acyltransferase, ec:1.1.1.8 - dehydrogenase (NAD+), ec:2.7.8.1 - EPT, ec:2.1.1.103 - N-methyltransferase, ec:2.7.1.107 - kinase (ATP), ec:3.1.1.32 - A1, ec:3.6.1.16 - diphosphatase, ec:1.1.1.261 - dehydrogenase, ec:2.7.1.32 - kinase, ec:2.3.1.52 - O-acyltransferase, ec:1.1.1.94 - dehydrogenase…
Glycolysis / Gluconeogenesis	35	189	map00010	ec:4.1.1.32 - carboxykinase (GTP), ec:1.2.1.3 - dehydrogenase (NAD+), ec:4.1.1.49 - carboxykinase (ATP), ec:2.3.1.12 - acetyltransferase, ec:2.7.2.3 - kinase, ec:3.1.3.10 - ec:3.1.3.10 glucose-1-phosphatase, ec:4.2.1.11 - hydratase, ec:3.2.1.86 - phospho-beta-glucosidase A, ec:5.3.1.1 - isomerase, ec:2.7.1.11 - phosphohexokinase, ec:5.3.1.9 - isomerase, ec:5.4.2.4 - mutase, ec:5.1.3.3 - 1-epimera…
Pyrimidine metabolism	45	184	map00240	ec:2.4.2.9 - phosphoribosyltransferase, ec:2.7.1.48 - kinase, ec:3.5.2.2 - hydantoinase, ec:3.6.1.9 - diphosphatase, ec:1.17.4.1 - reductase, ec:1.3.1.2 - dehydrogenase (NADP+), ec:3.5.1.6 - N-carbamoyl-beta-alanine amidohydrolase, ec:3.6.1.12 - diphosphatase, ec:3.5.4.12 - deaminase, ec:3.5.4.5 - deaminase, ec:2.7.1.83 - kinase, ec:3.6.1.5 - ATP-diphosphatase, ec:3.1.3.5 - uridine 5'-nucleotidas…
Pyruvate metabolism	40	175	map00620	ec:4.1.1.32 - carboxykinase (GTP), ec:1.2.1.3 - dehydrogenase (NAD+), ec:1.1.1.79 - reductase (NADP+), ec:4.1.1.49 - carboxykinase (ATP), ec:2.3.1.12 - acetyltransferase, ec:4.1.1.112 - decarboxylase, ec:1.1.1.37 - dehydrogenase, ec:1.1.1.28 - dehydrogenase, ec:1.2.5.2 - dehydrogenase (quinone), ec:2.7.9.1 - phosphate dikinase, ec:6.4.1.2 - carboxylase, ec:3.1.2.6 - hydrolase, ec:1.1.2.4 - dehydr…
Valine, leucine and isoleucine degradation	30	174	map00280	ec:1.2.1.3 - dehydrogenase (NAD+), ec:2.6.1.18 - transaminase, ec:2.3.1.168 - (2-methylpropanoyl)transferase, ec:4.2.1.18 - hydratase, ec:1.3.8.4 - dehydrogenase, ec:2.3.1.16 - C-acyltransferase, ec:5.1.99.1 - epimerase, ec:1.3.8.1 - acyl-CoA dehydrogenase, ec:2.6.1.42 - transaminase, ec:1.4.3.2 - oxidase, ec:2.6.1.6 - transaminase, ec:1.1.1.178 - dehydrogenase, ec:1.1.1.35 - dehydrogenase, ec:6.…
PD-L1 expression and PD-1 checkpoint pathway in cancer	1	174	map05235	ec:3.1.3.16 - phosphatase
Th1 and Th2 cell differentiation	1	174	map04658	ec:3.1.3.16 - phosphatase
Arachidonic acid metabolism	14	166	map00590	ec:1.1.1.189 - 9-reductase, ec:3.3.2.10 - epoxide hydrolase, ec:1.13.11.33 - 15-lipoxygenase, ec:1.14.14.1 - monooxygenase, ec:4.4.1.20 - synthase, ec:5.3.99.5 - synthase, ec:1.1.1.184 - reductase (NADPH), ec:5.3.99.2 - synthase, ec:1.1.1.188 - synthase, ec:3.3.2.6 - hydrolase, ec:1.11.1.9 - peroxidase, ec:1.14.99.1 - synthase, ec:5.3.99.3 - synthase, ec:3.1.1.4 - A2
Glutathione metabolism	20	165	map00480	ec:1.17.4.1 - reductase, ec:3.5.2.9 - (ATP-hydrolysing), ec:1.8.5.1 - dehydrogenase (ascorbate), ec:1.11.1.15 - thioredoxin peroxidase, ec:1.1.1.42 - dehydrogenase (NADP+), ec:1.11.1.12 - glutathione peroxidase, ec:2.5.1.16 - synthase, ec:6.3.2.2 - ligase, ec:4.3.2.9 - gamma-glutamyl-amino acid cyclotransferase, ec:1.8.1.7 - reductase, ec:3.4.19.13 - gamma-glutamate hydrolase, ec:1.5.4.1 - syntha…
Oxidative phosphorylation	8	165	map00190	ec:3.6.1.1 - diphosphatase, ec:1.9.3.1 - oxidase, ec:1.3.5.1 - dehydrogenase, ec:7.1.2.1 - H+-exporting transporter, ec:1.6.99.3 - dehydrogenase, ec:7.1.1.2 - reductase (H+-translocating), ec:2.7.4.1 - kinase, ec:1.6.5.11 - dehydrogenase (quinone)
Retinol metabolism	7	163	map00830	ec:2.3.1.76 - O-fatty-acyltransferase, ec:1.2.1.36 - dehydrogenase, ec:1.14.14.1 - monooxygenase, ec:1.1.1.105 - dehydrogenase (NAD+), ec:1.1.1.1 - dehydrogenase, ec:1.2.3.1 - oxidase, ec:2.4.1.17 - 1-naphthol glucuronyltransferase
Arginine and proline metabolism	38	161	map00330	ec:1.2.1.3 - dehydrogenase (NAD+), ec:1.5.3.17 - polyamine oxidase, ec:3.5.1.94 - hydrolase, ec:1.2.1.41 - dehydrogenase, ec:1.2.1.19 - dehydrogenase, ec:3.5.3.12 - deiminase, ec:2.6.1.23 - transaminase, ec:2.7.3.3 - kinase, ec:1.14.11.2 - 4-dioxygenase, ec:4.1.1.50 - decarboxylase, ec:4.1.1.19 - decarboxylase, ec:2.6.1.1 - transaminase, ec:2.5.1.16 - synthase, ec:4.1.3.16 - aldolase, ec:2.3.1.10…
Glycine, serine and threonine metabolism	44	157	map00260	ec:2.3.1.37 - synthase, ec:2.7.1.31 - 3-kinase, ec:1.2.1.11 - dehydrogenase, ec:4.3.1.18 - ammonia-lyase, ec:4.1.2.5 - aldolase, ec:2.7.1.39 - kinase, ec:2.1.2.1 - hydroxymethyltransferase, ec:1.1.1.81 - reductase, ec:2.1.1.5 - S-methyltransferase, ec:1.5.8.3 - dehydrogenase, ec:2.1.2.10 - S-aminomethyldihydrolipoylprotein:(6S)-tetrahydrofolate aminomethyltransferase (ammonia-forming), ec:2.3.1.2…
Starch and sucrose metabolism	33	153	map00500	ec:3.2.1.4 - endo-1,4-beta-D-glucanase, ec:3.2.1.10 - limit dextrinase (erroneous), ec:3.2.1.26 - invertase, ec:3.6.1.9 - diphosphatase, ec:2.7.7.9 - uridylyltransferase, ec:2.4.1.15 - synthase (UDP-forming), ec:3.2.1.1 - glycogenase, ec:3.2.1.86 - phospho-beta-glucosidase A, ec:2.4.1.21 - synthase (glycosyl-transferring), ec:2.4.1.12 - synthase (UDP-forming), ec:2.7.1.4 - fructokinase (phosphory…
Amino sugar and nucleotide sugar metabolism	53	147	map00520	ec:3.5.1.33 - deacetylase, ec:5.1.3.2 - 4-epimerase, ec:2.7.7.64 - uridylyltransferase, ec:5.1.3.9 - 2-epimerase, ec:2.7.7.9 - uridylyltransferase, ec:2.7.1.7 - mannokinase (phosphorylating), ec:2.6.1.87 - aminotransferase, ec:5.4.2.8 - mannose phosphomutase, ec:2.1.2.13 - formyltransferase, ec:3.2.1.14 - ChiC, ec:2.7.7.13 - guanylyltransferase, ec:5.1.3.12 - 5'-epimerase, ec:2.7.1.4 - fructokina…
Aminoacyl-tRNA biosynthesis	24	146	map00970	ec:6.1.1.22 - ligase, ec:6.1.1.3 - ligase, ec:6.1.1.10 - ligase, ec:6.1.1.18 - ligase, ec:6.1.1.7 - ligase, ec:6.1.1.23 - ligase, ec:6.1.1.14 - ligase, ec:6.1.1.4 - ligase, ec:6.1.1.20 - ligase, ec:6.1.1.11 - ligase, ec:6.1.1.1 - ligase, ec:6.1.1.19 - ligase, ec:2.1.2.9 - formyltransferase, ec:6.1.1.9 - ligase, ec:6.1.1.15 - ligase, ec:6.1.1.5 - ligase, ec:6.1.1.21 - ligase, ec:6.1.1.12 - ligase,…
Cysteine and methionine metabolism	49	135	map00270	ec:1.2.1.11 - dehydrogenase, ec:1.13.11.20 - dioxygenase, ec:2.6.1.57 - transaminase, ec:1.1.1.37 - dehydrogenase, ec:2.6.1.5 - transaminase, ec:4.1.1.50 - decarboxylase, ec:2.4.2.28 - phosphorylase, ec:2.1.1.13 - synthase, ec:2.3.1.30 - O-acetyltransferase, ec:2.1.1.5 - S-methyltransferase, ec:2.3.1.46 - O-succinyltransferase, ec:2.6.1.1 - transaminase, ec:1.13.11.54 - dioxygenase [iron(II)-requ…
Pentose and glucuronate interconversions	29	135	map00040	ec:2.7.1.17 - xylulokinase (phosphorylating), ec:5.1.3.1 - 3-epimerase, ec:2.7.1.47 - D-ribulokinase (phosphorylating), ec:2.7.7.64 - uridylyltransferase, ec:5.3.1.5 - isomerase, ec:2.7.7.9 - uridylyltransferase, ec:1.1.1.21 - reductase, ec:2.7.1.53 - L-xylulokinase (phosphorylating), ec:3.2.1.31 - beta-glucuronide glucuronohydrolase glucuronidase, ec:2.7.7.40 - cytidylyltransferase, ec:5.3.1.12 …
Phosphatidylinositol signaling system	26	134	map04070	ec:2.7.1.127 - 3-kinase, ec:2.7.1.158 - 2-kinase, ec:2.7.1.149 - 4-kinase, ec:3.1.3.56 - 5-phosphatase, ec:2.7.1.154 - 3-kinase, ec:2.7.1.107 - kinase (ATP), ec:2.7.1.137 - 3-kinase, ec:2.7.1.151 - multikinase, ec:3.1.4.11 - phospholipase C, ec:2.7.1.159 - 5/6-kinase, ec:3.1.3.36 - 5-phosphatase, ec:3.1.3.66 - 4-phosphatase, ec:2.7.11.13 - kinase C, ec:3.1.3.57 - 1-phosphatase, ec:2.7.1.67 - 4-ki…
Fatty acid biosynthesis	14	133	map00061	ec:6.2.1.3 - ligase, ec:2.3.1.85 - synthase system, ec:6.4.1.2 - carboxylase, ec:3.1.2.14 - hydrolase, ec:4.2.1.59 - dehydratase, ec:2.3.1.86 - synthase system, ec:2.3.1.180 - synthase III, ec:2.3.1.39 - S-malonyltransferase, ec:2.3.1.179 - synthase II, ec:2.3.1.41 - synthase I, ec:1.1.1.100 - reductase, ec:1.3.1.9 - reductase (NADH), ec:5.3.3.14 - protein] isomerase, ec:1.3.1.10 - reductase (NAD…
Glyoxylate and dicarboxylate metabolism	33	131	map00630	ec:3.5.1.9 - kynurenine formamidase, ec:4.1.3.1 - lyase, ec:1.1.1.79 - reductase (NADP+), ec:3.5.1.49 - ec:3.5.1.49 formamidase, ec:2.7.1.31 - 3-kinase, ec:1.1.1.93 - dehydrogenase, ec:4.1.1.2 - decarboxylase, ec:1.17.1.9 - dehydrogenase, ec:3.1.3.18 - phosphatase, ec:1.1.1.37 - dehydrogenase, ec:2.1.2.1 - hydroxymethyltransferase, ec:1.1.1.81 - reductase, ec:6.3.1.2 - synthetase, ec:3.5.1.68 - d…
Lysine degradation	26	129	map00310	ec:1.2.1.20 - dehydrogenase, ec:1.2.1.3 - dehydrogenase (NAD+), ec:1.2.4.2 - dehydrogenase (succinyl-transferring), ec:1.2.1.19 - dehydrogenase, ec:1.5.1.9 - dehydrogenase (NAD+, L-glutamate-forming), ec:1.14.13.59 - N6-monooxygenase (NADPH), ec:1.4.1.12 - dehydrogenase, ec:1.14.11.4 - 5-dioxygenase, ec:1.1.1.35 - dehydrogenase, ec:1.2.1.31 - dehydrogenase, ec:2.7.1.81 - kinase, ec:1.2.1.47 - deh…
Inositol phosphate metabolism	34	125	map00562	ec:2.7.1.127 - 3-kinase, ec:2.7.1.158 - 2-kinase, ec:4.2.1.44 - dehydratase, ec:3.1.3.8 - 1-phytase, ec:2.7.1.149 - 4-kinase, ec:2.7.1.92 - 5-keto-2-deoxygluconokinase, ec:3.1.3.56 - 5-phosphatase, ec:2.7.1.154 - 3-kinase, ec:3.1.3.62 - inositol-polyphosphate phosphatase, ec:5.3.1.1 - isomerase, ec:5.5.1.4 - synthase, ec:2.7.1.137 - 3-kinase, ec:2.7.1.151 - multikinase, ec:5.3.1.30 - isomerase, e…
Galactose metabolism	24	125	map00052	ec:5.1.3.2 - 4-epimerase, ec:3.2.1.10 - limit dextrinase (erroneous), ec:3.2.1.26 - invertase, ec:2.7.7.64 - uridylyltransferase, ec:2.7.7.9 - uridylyltransferase, ec:1.1.1.21 - reductase, ec:3.2.1.23 - lactase (ambiguous), ec:3.2.1.22 - melibiase, ec:2.7.1.11 - phosphohexokinase, ec:5.1.3.3 - 1-epimerase, ec:3.5.1.25 - deacetylase, ec:2.7.1.1 - hexokinase type IV glucokinase, ec:3.1.3.9 - glucos…
Porphyrin and chlorophyll metabolism	37	123	map00860	ec:2.3.1.37 - synthase, ec:3.1.1.14 - CLH, ec:4.99.1.4 - ferrochelatase, ec:4.2.1.75 - synthase, ec:1.3.1.24 - reductase, ec:3.2.1.31 - beta-glucuronide glucuronohydrolase glucuronidase, ec:5.4.99.61 - methylmutase, ec:4.1.1.37 - decarboxylase, ec:2.1.1.133 - C11-methyltransferase, ec:4.2.1.24 - synthase, ec:1.16.1.3 - reductase, ec:5.4.3.8 - 2,1-aminomutase, ec:2.1.1.130 - C20-methyltransferase,…
Aminobenzoate degradation	5	123	map00627	ec:1.2.1.28 - dehydrogenase (NAD+), ec:1.14.14.1 - monooxygenase, ec:3.6.1.7 - acetylphosphatase, ec:3.5.1.4 - acylamidase, ec:4.2.1.17 - hydratase
Carbon fixation pathways in prokaryotes	31	121	map00720	ec:4.2.1.116 - dehydratase, ec:1.5.1.5 - dehydrogenase (NADP+), ec:1.1.1.298 - dehydrogenase (NADP+), ec:1.1.1.37 - dehydrogenase, ec:1.3.1.84 - reductase (NADPH), ec:1.1.1.42 - dehydrogenase (NADP+), ec:5.1.99.1 - epimerase, ec:1.3.5.1 - dehydrogenase, ec:2.7.9.1 - phosphate dikinase, ec:6.4.1.2 - carboxylase, ec:1.5.1.20 - reductase [NAD(P)H], ec:3.5.4.9 - cyclohydrolase, ec:4.2.1.3 - hydratase…
Phenylalanine metabolism	29	121	map00360	ec:4.1.3.39 - aldolase, ec:5.3.2.1 - tautomerase, ec:1.1.1.237 - reductase, ec:2.6.1.57 - transaminase, ec:1.13.11.27 - dioxygenase, ec:4.2.1.80 - hydratase, ec:1.14.16.1 - 4-monooxygenase, ec:2.6.1.5 - transaminase, ec:4.1.1.28 - decarboxylase, ec:2.6.1.1 - transaminase, ec:1.14.13.149 - 1,2-epoxidase, ec:2.6.1.9 - transaminase, ec:1.4.3.2 - oxidase, ec:1.1.1.157 - dehydrogenase, ec:3.5.1.4 - ac…
Butanoate metabolism	27	120	map00650	ec:4.1.1.15 - decarboxylase, ec:5.1.2.3 - epimerase, ec:1.2.1.24 - dehydrogenase (NAD+), ec:1.2.1.16 - dehydrogenase [NAD(P)+], ec:1.3.5.1 - dehydrogenase, ec:1.3.8.1 - acyl-CoA dehydrogenase, ec:1.1.1.30 - dehydrogenase, ec:2.6.1.19 - transaminase, ec:3.1.1.75 - depolymerase, ec:1.1.99.2 - dehydrogenase, ec:1.1.1.157 - dehydrogenase, ec:1.1.1.35 - dehydrogenase, ec:2.2.1.6 - synthase, ec:2.3.3.1…
Linoleic acid metabolism	5	118	map00591	ec:1.14.19.3 - 6-desaturase, ec:1.13.11.33 - 15-lipoxygenase, ec:1.14.14.1 - monooxygenase, ec:1.13.11.12 - 13S-lipoxygenase, ec:3.1.1.4 - A2
Alanine, aspartate and glutamate metabolism	34	116	map00250	ec:1.4.1.14 - synthase (NADH), ec:1.4.3.1 - oxidase, ec:4.1.1.15 - decarboxylase, ec:6.3.4.5 - synthase, ec:1.4.1.2 - dehydrogenase, ec:1.2.1.24 - dehydrogenase (NAD+), ec:4.3.1.1 - ammonia-lyase, ec:6.3.1.2 - synthetase, ec:3.5.1.3 - alpha-keto acid-omega-amidase, ec:1.2.1.16 - dehydrogenase [NAD(P)+], ec:6.3.4.16 - synthase (ammonia), ec:6.3.5.5 - synthase (glutamine-hydrolysing), ec:5.1.1.13 -…
Nicotinate and nicotinamide metabolism	28	112	map00760	ec:6.3.4.21 - phosphoribosyltransferase, ec:2.7.7.1 - adenylyltransferase, ec:3.6.1.9 - diphosphatase, ec:2.7.1.23 - kinase, ec:2.1.1.1 - N-methyltransferase, ec:6.3.1.5 - synthase, ec:1.14.13.114 - 3-monooxygenase, ec:3.1.3.5 - uridine 5'-nucleotidase, ec:1.2.1.24 - dehydrogenase (NAD+), ec:1.2.1.16 - dehydrogenase [NAD(P)+], ec:3.2.2.1 - nucleosidase, ec:2.4.2.19 - diphosphorylase (carboxylatin…
beta-Alanine metabolism	21	112	map00410	ec:1.2.1.3 - dehydrogenase (NAD+), ec:6.3.2.1 - ligase (AMP-forming), ec:3.5.2.2 - hydantoinase, ec:1.5.3.17 - polyamine oxidase, ec:1.3.1.2 - dehydrogenase (NADP+), ec:4.1.1.15 - decarboxylase, ec:2.6.1.18 - transaminase, ec:3.5.1.6 - N-carbamoyl-beta-alanine amidohydrolase, ec:1.2.1.19 - dehydrogenase, ec:4.1.1.9 - decarboxylase, ec:1.3.3.6 - oxidase, ec:1.3.8.1 - acyl-CoA dehydrogenase, ec:2.6…
Nitrotoluene degradation	1	112	map00633	ec:2.3.1.5 - N-acetyltransferase
Tyrosine metabolism	30	111	map00350	ec:5.3.2.1 - tautomerase, ec:1.1.1.237 - reductase, ec:2.6.1.57 - transaminase, ec:1.13.11.27 - dioxygenase, ec:5.2.1.2 - isomerase, ec:2.6.1.5 - transaminase, ec:4.1.1.28 - decarboxylase, ec:1.2.1.16 - dehydrogenase [NAD(P)+], ec:1.14.17.1 - beta-monooxygenase, ec:2.6.1.1 - transaminase, ec:1.14.14.9 - 3-monooxygenase, ec:1.2.1.60 - dehydrogenase, ec:5.3.3.12 - isomerase, ec:4.1.1.25 - decarboxy…
Citrate cycle (TCA cycle)	21	110	map00020	ec:4.1.1.32 - carboxykinase (GTP), ec:4.1.1.49 - carboxykinase (ATP), ec:2.3.1.12 - acetyltransferase, ec:1.2.4.2 - dehydrogenase (succinyl-transferring), ec:1.1.1.37 - dehydrogenase, ec:1.1.1.42 - dehydrogenase (NADP+), ec:1.3.5.1 - dehydrogenase, ec:1.1.5.4 - dehydrogenase (quinone), ec:4.2.1.3 - hydratase, ec:4.2.1.2 - hydratase, ec:6.2.1.4 - ligase (GDP-forming), ec:2.3.1.61 - succinyltransfe…
Ascorbate and aldarate metabolism	19	109	map00053	ec:1.2.1.3 - dehydrogenase (NAD+), ec:2.7.7.64 - uridylyltransferase, ec:2.7.1.53 - L-xylulokinase (phosphorylating), ec:1.8.5.1 - dehydrogenase (ascorbate), ec:1.10.3.3 - oxidase, ec:1.1.3.8 - oxidase, ec:1.1.1.22 - 6-dehydrogenase, ec:4.1.1.85 - decarboxylase, ec:4.2.1.42 - dehydratase, ec:5.1.3.22 - 3-epimerase, ec:5.1.3.4 - 4-epimerase, ec:1.6.5.4 - reductase (NADH), ec:1.13.99.1 - oxygenase,…
Fatty acid elongation	11	107	map00062	ec:1.1.1.330 - 3-oxoacyl-CoA reductase, ec:4.2.1.134 - (3R)-3-hydroxyacyl-CoA dehydratase, ec:2.3.1.16 - C-acyltransferase, ec:3.1.2.2 - hydrolase, ec:2.3.1.199 - 3-oxoacyl-CoA synthase, ec:1.3.1.38 - reductase (NADPH), ec:1.1.1.35 - dehydrogenase, ec:1.1.1.211 - dehydrogenase, ec:4.2.1.74 - hydratase, ec:4.2.1.17 - hydratase, ec:3.1.2.22 - hydrolase
Phenylpropanoid biosynthesis	3	94	map00940	ec:1.11.1.7 - lactoperoxidase, ec:3.2.1.21 - gentiobiase, ec:6.2.1.12 - ligase
Nitrogen metabolism	16	93	map00910	ec:1.7.99.1 - reductase, ec:3.5.1.49 - ec:3.5.1.49 formamidase, ec:1.4.1.14 - synthase (NADH), ec:4.2.1.1 - anhydrase, ec:1.4.1.2 - dehydrogenase, ec:4.2.1.104 - cyanate lyase, ec:6.3.1.2 - synthetase, ec:1.7.1.4 - reductase [NAD(P)H], ec:6.3.4.16 - synthase (ammonia), ec:1.9.6.1 - reductase (cytochrome), ec:1.4.1.3 - dehydrogenase [NAD(P)+], ec:1.4.7.1 - synthase (ferredoxin), ec:1.4.1.4 - dehyd…
Pentose phosphate pathway	25	88	map00030	ec:5.1.3.1 - 3-epimerase, ec:1.1.5.2 - 1-dehydrogenase (PQQ, quinone), ec:2.7.1.11 - phosphohexokinase, ec:5.3.1.9 - isomerase, ec:3.1.3.11 - hexose diphosphatase, ec:5.3.1.6 - isomerase, ec:4.2.1.12 - dehydratase, ec:2.7.1.15 - deoxyribokinase, ec:2.2.1.1 - glycolaldehydetransferase, ec:2.7.1.45 - 2-keto-3-deoxygluconokinase, ec:4.1.2.13 - aldolase, ec:2.7.1.12 - gluconokinase (phosphorylating),…
Folate biosynthesis	30	86	map00790	ec:3.4.19.9 - gamma-glutamyl hydrolase, ec:2.5.1.15 - synthase, ec:1.7.1.13 - synthase, ec:1.14.16.4 - 5-monooxygenase, ec:1.1.1.21 - reductase, ec:6.3.2.12 - synthase, ec:1.14.16.1 - 4-monooxygenase, ec:2.10.1.1 - molybdotransferase, ec:4.2.1.96 - dehydratase, ec:2.7.7.77 - cofactor guanylyltransferase, ec:1.1.1.153 - reductase (L-erythro-7,8-dihydrobiopterin forming), ec:3.5.4.25 - cyclohydrola…
Various types of N-glycan biosynthesis	20	84	map00513	ec:2.4.1.101 - 2-beta-N-acetylglucosaminyltransferase, ec:2.4.1.131 - alpha-1,2-mannosyltransferase, ec:2.4.1.261 - alpha-1,2-mannosyltransferase, ec:2.4.1.214 - 3-alpha-L-fucosyltransferase, ec:2.4.1.141 - N-acetylglucosaminyltransferase, ec:2.4.1.132 - alpha-1,3-mannosyltransferase, ec:2.4.1.257 - alpha-1,6-mannosyltransferase, ec:2.4.1.232 - alpha-1,6-mannosyltransferase, ec:2.4.1.145 - 4-beta…
Propanoate metabolism	29	79	map00640	ec:2.6.1.18 - transaminase, ec:4.1.1.9 - decarboxylase, ec:2.3.1.168 - (2-methylpropanoyl)transferase, ec:1.3.3.6 - oxidase, ec:5.1.99.1 - epimerase, ec:4.2.1.79 - dehydratase, ec:6.4.1.2 - carboxylase, ec:1.3.8.1 - acyl-CoA dehydrogenase, ec:2.1.3.1 - carboxytransferase, ec:2.6.1.19 - transaminase, ec:6.2.1.4 - ligase (GDP-forming), ec:2.7.2.1 - kinase, ec:6.2.1.1 - ligase, ec:2.3.1.8 - acetyltr…
Ether lipid metabolism	12	79	map00565	ec:3.1.4.4 - D, ec:2.3.1.67 - O-acetyltransferase, ec:2.7.8.1 - EPT, ec:3.1.4.39 - phosphodiesterase, ec:2.8.2.11 - sulfotransferase, ec:2.4.1.47 - galactosyltransferase, ec:2.7.8.2 - cholinephosphotransferase, ec:3.1.4.3 - C, ec:2.5.1.26 - synthase, ec:3.1.3.4 - phosphatase, ec:3.1.1.47 - esterase, ec:3.1.1.4 - A2
Methane metabolism	21	78	map00680	ec:1.7.2.3 - reductase, ec:1.17.1.9 - dehydrogenase, ec:4.2.1.11 - hydratase, ec:1.1.1.37 - dehydrogenase, ec:2.1.2.1 - hydroxymethyltransferase, ec:2.7.1.11 - phosphohexokinase, ec:4.1.1.25 - decarboxylase, ec:3.1.3.11 - hexose diphosphatase, ec:4.1.2.13 - aldolase, ec:2.7.2.1 - kinase, ec:1.1.1.29 - dehydrogenase, ec:6.2.1.1 - ligase, ec:2.3.1.8 - acetyltransferase, ec:2.7.9.2 - water dikinase,…
Sphingolipid metabolism	20	74	map00600	ec:3.2.1.23 - lactase (ambiguous), ec:3.2.1.22 - melibiase, ec:3.1.4.41 - phosphodiesterase D, ec:2.8.2.11 - sulfotransferase, ec:3.2.1.18 - neuraminidase, ec:1.1.1.102 - reductase, ec:2.7.8.3 - cholinephosphotransferase, ec:2.4.1.47 - galactosyltransferase, ec:2.7.1.138 - kinase, ec:3.2.1.45 - psychosine hydrolase, ec:2.7.8.27 - synthase, ec:3.1.4.12 - phosphodiesterase, ec:3.1.6.1 - sulfatase, …
N-Glycan biosynthesis	26	71	map00510	ec:2.4.1.101 - 2-beta-N-acetylglucosaminyltransferase, ec:2.4.1.117 - beta-glucosyltransferase, ec:2.4.1.259 - alpha-1,2-mannosyltransferase, ec:2.4.1.131 - alpha-1,2-mannosyltransferase, ec:2.4.1.144 - 4-beta-N-acetylglucosaminyltransferase, ec:2.4.1.261 - alpha-1,2-mannosyltransferase, ec:3.2.1.106 - glucosidase, ec:2.4.1.141 - N-acetylglucosaminyltransferase, ec:2.4.1.132 - alpha-1,3-mannosylt…
Carbon fixation in photosynthetic organisms	20	71	map00710	ec:5.1.3.1 - 3-epimerase, ec:4.1.1.49 - carboxykinase (ATP), ec:2.7.2.3 - kinase, ec:2.7.1.14 - heptulokinase, ec:1.1.1.37 - dehydrogenase, ec:5.3.1.1 - isomerase, ec:2.7.9.1 - phosphate dikinase, ec:2.6.1.1 - transaminase, ec:1.2.1.12 - dehydrogenase (phosphorylating), ec:3.1.3.11 - hexose diphosphatase, ec:5.3.1.6 - isomerase, ec:1.2.1.59 - dehydrogenase (NAD(P)+) (phosphorylating), ec:2.2.1.1 …
Biosynthesis of unsaturated fatty acids	9	71	map01040	ec:1.1.1.330 - 3-oxoacyl-CoA reductase, ec:1.14.19.3 - 6-desaturase, ec:1.3.3.6 - oxidase, ec:4.2.1.134 - (3R)-3-hydroxyacyl-CoA dehydratase, ec:2.3.1.16 - C-acyltransferase, ec:3.1.2.2 - hydrolase, ec:2.3.1.199 - 3-oxoacyl-CoA synthase, ec:1.14.19.1 - 9-desaturase, ec:2.3.1.176 - C-acyltransferase
Pantothenate and CoA biosynthesis	21	70	map00770	ec:6.3.2.1 - ligase (AMP-forming), ec:3.5.2.2 - hydantoinase, ec:3.6.1.9 - diphosphatase, ec:1.3.1.2 - dehydrogenase (NADP+), ec:3.5.1.6 - N-carbamoyl-beta-alanine amidohydrolase, ec:4.2.1.9 - dehydratase, ec:3.1.4.14 - phosphodiesterase, ec:6.3.2.5 - ligase (CTP), ec:1.1.1.169 - 2-reductase, ec:2.7.1.24 - kinase, ec:2.6.1.42 - transaminase, ec:1.1.1.86 - reductoisomerase (NADP+), ec:2.6.1.6 - tr…
Histidine metabolism	17	70	map00340	ec:1.2.1.3 - dehydrogenase (NAD+), ec:4.2.1.19 - dehydratase, ec:2.1.1.22 - N-methyltransferase, ec:4.2.1.49 - hydratase, ec:3.5.1.68 - deformylase, ec:5.3.1.16 - isomerase, ec:2.6.1.9 - transaminase, ec:2.1.2.5 - formimidoyltransferase, ec:3.5.2.7 - 4(5)-imidazolone-5(4)-propionic acid hydrolase, ec:3.1.3.15 - histidinol phosphate phosphatase, ec:3.4.13.18 - nonspecific dipeptidase, ec:1.2.1.5 -…
Caprolactam degradation	7	69	map00930	ec:1.2.1.4 - dehydrogenase (NADP+), ec:1.1.1.35 - dehydrogenase, ec:1.14.15.3 - 1-monooxygenase, ec:1.1.1.2 - dehydrogenase (NADP+), ec:4.2.1.103 - hydratase, ec:4.2.1.17 - hydratase, ec:3.1.1.17 - lactonase
Fructose and mannose metabolism	31	67	map00051	ec:2.7.1.56 - fructose-1-phosphate kinase, ec:5.3.1.5 - isomerase, ec:1.1.1.140 - 2-dehydrogenase, ec:1.1.1.21 - reductase, ec:2.7.1.7 - mannokinase (phosphorylating), ec:5.4.2.8 - mannose phosphomutase, ec:3.1.3.70 - phosphatase, ec:5.3.1.1 - isomerase, ec:2.7.7.13 - guanylyltransferase, ec:2.7.1.11 - phosphohexokinase, ec:2.7.1.4 - fructokinase (phosphorylating), ec:1.1.1.17 - 5-dehydrogenase, …
Arginine biosynthesis	25	65	map00220	ec:3.5.1.16 - deacetylase, ec:6.3.4.5 - synthase, ec:1.4.1.2 - dehydrogenase, ec:6.3.1.2 - synthetase, ec:2.7.2.8 - kinase, ec:6.3.4.16 - synthase (ammonia), ec:2.6.1.1 - transaminase, ec:4.3.2.1 - lyase, ec:2.6.1.11 - transaminase, ec:3.5.3.6 - deiminase, ec:2.3.1.35 - N-acetyltransferase, ec:6.3.4.6 - carboxylase, ec:1.4.1.3 - dehydrogenase [NAD(P)+], ec:2.3.1.1 - N-acetyltransferase, ec:3.5.1.…
Limonene and pinene degradation	2	65	map00903	ec:1.2.1.3 - dehydrogenase (NAD+), ec:4.2.1.17 - hydratase
One carbon pool by folate	18	62	map00670	ec:4.3.1.4 - cyclodeaminase, ec:1.5.1.5 - dehydrogenase (NADP+), ec:2.1.2.1 - hydroxymethyltransferase, ec:2.1.1.13 - synthase, ec:1.5.1.20 - reductase [NAD(P)H], ec:2.1.2.10 - S-aminomethyldihydrolipoylprotein:(6S)-tetrahydrofolate aminomethyltransferase (ammonia-forming), ec:3.5.4.9 - cyclohydrolase, ec:2.1.2.5 - formimidoyltransferase, ec:1.5.1.6 - dehydrogenase, ec:6.3.3.2 - cyclo-ligase, ec:…
Riboflavin metabolism	15	62	map00740	ec:2.5.1.78 - synthase, ec:3.6.1.9 - diphosphatase, ec:1.5.1.39 - reductase [NAD(P)H], ec:3.5.4.25 - cyclohydrolase II, ec:1.5.1.36 - reductase (NADH), ec:2.7.7.2 - synthetase, ec:1.5.1.41 - reductase [NAD(P)H], ec:1.1.1.193 - reductase, ec:3.5.4.26 - deaminase, ec:3.1.3.2 - phosphatase, ec:4.1.99.12 - synthase, ec:1.5.1.30 - reductase (NADPH), ec:1.5.1.38 - reductase (NADPH), ec:2.7.1.26 - kinas…
Other glycan degradation	9	60	map00511	ec:3.2.1.23 - lactase (ambiguous), ec:3.5.1.26 - aspartylglucosylamine deaspartylase, ec:3.2.1.96 - endo-beta-N-acetylglucosaminidase, ec:3.2.1.18 - neuraminidase, ec:3.2.1.24 - alpha-D-mannosidase, ec:3.2.1.45 - psychosine hydrolase, ec:3.2.1.51 - alpha-fucosidase, ec:3.2.1.25 - mannanase, ec:3.2.1.52 - hexosaminidase
Biotin metabolism	16	59	map00780	ec:2.6.1.62 - transaminase, ec:2.1.1.197 - protein] O-methyltransferase, ec:3.5.1.12 - amidohydrolase biotinidase, ec:6.2.1.14 - ligase, ec:6.3.4.9 - ligase, ec:4.2.1.59 - dehydratase, ec:6.3.4.10 - (ATP-hydrolysing)] ligase, ec:2.3.1.47 - synthase, ec:2.3.1.179 - synthase II, ec:6.3.3.3 - synthase, ec:6.3.4.11 - ligase, ec:2.3.1.41 - synthase I, ec:1.1.1.100 - reductase, ec:2.8.1.6 - synthase, e…
Benzoate degradation	13	58	map00362	ec:4.1.3.39 - aldolase, ec:4.2.1.80 - hydratase, ec:2.3.1.16 - C-acyltransferase, ec:1.1.1.157 - dehydrogenase, ec:4.1.1.77 - decarboxylase, ec:2.3.1.174 - thiolase, ec:1.1.1.35 - dehydrogenase, ec:1.2.1.10 - dehydrogenase (acetylating), ec:1.3.8.6 - dehydrogenase (ETF), ec:4.1.1.44 - decarboxylase, ec:2.3.1.9 - C-acetyltransferase, ec:4.2.1.17 - hydratase, ec:1.13.11.2 - 2,3-dioxygenase
alpha-Linolenic acid metabolism	7	58	map00592	ec:1.3.3.6 - oxidase, ec:2.3.1.16 - C-acyltransferase, ec:3.1.1.32 - A1, ec:1.1.1.1 - dehydrogenase, ec:1.13.11.12 - 13S-lipoxygenase, ec:4.2.1.17 - hydratase, ec:3.1.1.4 - A2
Selenocompound metabolism	14	54	map00450	ec:1.97.1.9 - reductase, ec:6.1.1.10 - ligase, ec:2.1.1.13 - synthase, ec:2.1.1.96 - S-methyltransferase, ec:4.4.1.11 - gamma-lyase, ec:2.1.1.14 - S-methyltransferase, ec:2.7.9.3 - water dikinase, ec:4.4.1.1 - gamma-lyase, ec:2.7.7.4 - adenylyltransferase, ec:4.4.1.16 - lyase, ec:1.8.1.9 - reductase, ec:2.9.1.1 - selenium transferase, ec:4.4.1.13 - beta-lyase, ec:2.5.1.48 - gamma-synthase
Chloroalkane and chloroalkene degradation	4	49	map00625	ec:1.2.1.3 - dehydrogenase (NAD+), ec:3.3.2.10 - epoxide hydrolase, ec:1.1.1.1 - dehydrogenase, ec:3.8.1.5 - dehalogenase
Geraniol degradation	4	49	map00281	ec:2.3.1.16 - C-acyltransferase, ec:1.1.1.35 - dehydrogenase, ec:4.2.1.17 - hydratase, ec:4.1.3.4 - lyase
Glycosaminoglycan degradation	12	48	map00531	ec:3.2.1.31 - beta-glucuronide glucuronohydrolase glucuronidase, ec:3.1.6.13 - chondroitinsulfatase, ec:3.2.1.23 - lactase (ambiguous), ec:3.1.6.4 - chondroitin sulfatase, ec:3.2.1.35 - hyaluronidase, ec:3.2.1.50 - alpha-acetylglucosaminidase, ec:3.1.6.14 - chondroitinsulfatase, ec:3.2.1.76 - alpha-L-iduronidase, ec:2.3.1.78 - N-acetyltransferase, ec:3.1.6.12 - chondroitinsulfatase, ec:3.2.1.52 -…
Insect hormone biosynthesis	3	48	map00981	ec:1.2.1.3 - dehydrogenase (NAD+), ec:1.14.99.22 - 20-monooxygenase, ec:1.1.1.216 - dehydrogenase (NADP+)
Cyanoamino acid metabolism	7	46	map00460	ec:3.5.1.49 - ec:3.5.1.49 formamidase, ec:2.1.2.1 - hydroxymethyltransferase, ec:1.4.99.5 - dehydrogenase (cyanide-forming), ec:3.2.1.21 - gentiobiase, ec:2.3.2.2 - glutamyl transpeptidase, ec:6.3.1.1 - ligase, ec:3.5.1.1 - asparaginase II
Terpenoid backbone biosynthesis	26	45	map00900	ec:2.7.4.2 - kinase, ec:2.5.1.84 - diphosphate synthase [geranyl-diphosphate specific], ec:1.8.3.5 - oxidase, ec:2.5.1.58 - farnesyltransferase, ec:2.7.1.36 - kinase, ec:1.1.1.34 - reductase (NADPH), ec:2.1.1.100 - O-methyltransferase, ec:4.1.1.33 - decarboxylase, ec:2.5.1.30 - diphosphate synthase, ec:2.5.1.85 - diphosphate synthase [geranylgeranyl-diphosphate specific], ec:1.17.7.1 - synthase (…
Taurine and hypotaurine metabolism	10	40	map00430	ec:1.13.11.20 - dioxygenase, ec:4.1.1.15 - decarboxylase, ec:1.4.1.2 - dehydrogenase, ec:1.13.11.19 - dioxygenase, ec:2.7.2.1 - kinase, ec:4.1.1.29 - decarboxylase, ec:2.3.1.8 - acetyltransferase, ec:1.14.11.17 - dioxygenase, ec:1.4.1.1 - dehydrogenase, ec:2.3.2.2 - glutamyl transpeptidase
Phenylalanine, tyrosine and tryptophan biosynthesis	23	38	map00400	ec:4.1.1.48 - synthase, ec:2.6.1.57 - transaminase, ec:1.14.16.1 - 4-monooxygenase, ec:4.1.3.27 - synthase, ec:2.6.1.5 - transaminase, ec:2.5.1.19 - 1-carboxyvinyltransferase, ec:5.3.1.24 - isomerase, ec:1.3.1.12 - dehydrogenase, ec:4.2.3.5 - synthase, ec:2.6.1.1 - transaminase, ec:2.5.1.54 - synthase, ec:2.7.1.71 - kinase, ec:2.6.1.9 - transaminase, ec:4.2.1.20 - synthase, ec:1.4.3.2 - oxidase, …
mTOR signaling pathway	3	38	map04150	ec:2.7.11.11 - protein kinase, ec:2.7.1.153 - 3-kinase, ec:2.7.11.24 - protein kinase
Cutin, suberine and wax biosynthesis	4	37	map00073	ec:2.3.1.20 - O-acyltransferase, ec:1.2.1.50 - acyl-protein thioester reductase, ec:2.3.1.75 - O-fatty-acyltransferase, ec:1.2.1.84 - fatty acyl-CoA reductase
Lysine biosynthesis	15	35	map00300	ec:1.2.1.11 - dehydrogenase, ec:2.6.1.57 - transaminase, ec:2.3.1.89 - N-acetyltransferase, ec:4.1.1.20 - decarboxylase, ec:5.1.1.7 - epimerase, ec:2.3.1.117 - N-succinyltransferase, ec:2.7.2.4 - kinase, ec:6.3.2.13 - ligase, ec:6.3.2.10 - ligase, ec:3.5.1.18 - desuccinylase, ec:2.6.1.17 - transaminase, ec:1.17.1.8 - reductase, ec:2.6.1.39 - transaminase, ec:4.3.3.7 - synthase, ec:1.1.1.3 - dehyd…
Isoquinoline alkaloid biosynthesis	10	30	map00950	ec:2.6.1.57 - transaminase, ec:2.6.1.5 - transaminase, ec:4.1.1.28 - decarboxylase, ec:2.6.1.1 - transaminase, ec:4.1.1.25 - decarboxylase, ec:1.4.3.2 - oxidase, ec:1.14.18.1 - monophenol monooxygenase, ec:1.14.16.2 - 3-monooxygenase, ec:1.10.3.1 - oxidase, ec:1.4.3.21 - oxidase
Steroid degradation	4	29	map00984	ec:5.3.3.1 - Delta-isomerase, ec:1.1.1.51 - 17)beta-hydroxysteroid dehydrogenase, ec:1.1.1.145 - dehydrogenase, ec:1.3.99.5 - 4-dehydrogenase (acceptor)
Sulfur metabolism	17	28	map00920	ec:7.6.2.7 - taurine transporter, ec:1.8.1.2 - sulfite reductase (NADPH), ec:1.14.14.5 - monooxygenase, ec:1.13.11.18 - dioxygenase, ec:2.3.1.30 - O-acetyltransferase, ec:2.3.1.46 - O-succinyltransferase, ec:7.3.2.3 - sulfate transporter, ec:2.8.1.1 - sulfurtransferase, ec:4.4.1.2 - desulfhydrase, ec:1.14.11.17 - dioxygenase, ec:2.7.7.4 - adenylyltransferase, ec:2.5.1.47 - synthase, ec:2.7.1.25 -…
Streptomycin biosynthesis	9	28	map00521	ec:5.5.1.4 - synthase, ec:4.2.1.46 - 4,6-dehydratase, ec:2.7.1.1 - hexokinase type IV glucokinase, ec:1.1.1.18 - 2-dehydrogenase, ec:2.7.1.2 - glucokinase (phosphorylating), ec:5.4.2.2 - (alpha-D-glucose-1,6-bisphosphate-dependent), ec:1.1.1.133 - reductase, ec:2.7.7.24 - thymidylyltransferase, ec:3.1.3.25 - phosphatase
Tropane, piperidine and pyridine alkaloid biosynthesis	9	27	map00960	ec:1.1.1.237 - reductase, ec:2.6.1.57 - transaminase, ec:2.6.1.5 - transaminase, ec:2.6.1.1 - transaminase, ec:2.6.1.9 - transaminase, ec:1.5.1.21 - reductase (NADPH), ec:1.4.3.21 - oxidase, ec:1.14.13.101 - N-oxygenase, ec:4.1.1.18 - decarboxylase
Glycosphingolipid biosynthesis - globo and isoglobo series	5	27	map00603	ec:3.2.1.22 - melibiase, ec:3.2.1.49 - alpha-acetylgalactosaminidase, ec:2.4.1.228 - 4-alpha-galactosyltransferase, ec:2.4.1.69 - 1 galactoside alpha-(1,2)-fucosyltransferase, ec:3.2.1.52 - hexosaminidase
Toluene degradation	4	26	map00623	ec:1.2.1.28 - dehydrogenase (NAD+), ec:3.1.1.45 - maleylacetate enol-lactonase, ec:2.8.3.15 - CoA-transferase, ec:1.1.1.35 - dehydrogenase
Mucin type O-glycan biosynthesis	2	26	map00512	ec:2.4.1.122 - beta-1,3-galactosyltransferase, ec:2.4.1.41 - N-acetylgalactosaminyltransferase
Steroid biosynthesis	8	25	map00100	ec:1.1.1.170 - 3-dehydrogenase (decarboxylating), ec:1.1.1.270 - 3-dehydrogenase, ec:1.3.1.72 - reductase, ec:2.5.1.21 - synthase, ec:2.3.1.26 - O-acyltransferase, ec:3.1.1.13 - esterase, ec:1.3.1.70 - reductase, ec:1.14.14.17 - monooxygenase
Glycosphingolipid biosynthesis - ganglio series	3	24	map00604	ec:3.2.1.23 - lactase (ambiguous), ec:2.4.1.62 - galactosyltransferase, ec:3.2.1.52 - hexosaminidase
Novobiocin biosynthesis	5	23	map00401	ec:2.6.1.57 - transaminase, ec:2.6.1.5 - transaminase, ec:1.3.1.12 - dehydrogenase, ec:2.6.1.1 - transaminase, ec:2.6.1.9 - transaminase
Ubiquinone and other terpenoid-quinone biosynthesis	18	22	map00130	ec:2.5.1.39 - polyprenyltransferase, ec:1.1.1.237 - reductase, ec:1.6.5.2 - dehydrogenase (quinone), ec:2.1.1.64 - 3-O-methyltransferase, ec:4.1.3.36 - synthase, ec:1.13.11.27 - dioxygenase, ec:2.6.1.5 - transaminase, ec:2.1.1.163 - methyltransferase, ec:4.2.99.20 - synthase, ec:6.2.1.26 - ligase, ec:2.2.1.9 - synthase, ec:4.1.1.90 - 4-carboxylase, ec:4.1.1.98 - decarboxylase, ec:2.1.1.201 - meth…
D-Glutamine and D-glutamate metabolism	6	21	map00471	ec:5.1.1.3 - racemase, ec:6.3.2.9 - ligase, ec:5.1.1.10 - racemase, ec:1.4.1.3 - dehydrogenase [NAD(P)+], ec:6.3.2.8 - ligase, ec:3.5.1.2 - glutaminase I
Peptidoglycan biosynthesis	13	19	map00550	ec:6.3.2.9 - ligase, ec:3.4.16.4 - D-Ala-D-Ala carboxypeptidase, ec:2.7.8.13 - MraY transferase, ec:2.4.1.227 - beta-N-acetylglucosaminyltransferase, ec:6.3.2.13 - ligase, ec:6.3.2.10 - ligase, ec:1.3.1.98 - dehydrogenase, ec:2.5.1.7 - 1-carboxyvinyltransferase, ec:6.3.2.8 - ligase, ec:3.6.1.27 - phosphatase, ec:2.4.1.129 - glycosyltransferase, ec:3.4.17.14 - D-Ala-D-Ala carboxypeptidase, ec:6.3.…
Glycosaminoglycan biosynthesis - keratan sulfate	4	18	map00533	ec:2.4.1.38 - beta-1,4-galactosyltransferase, ec:2.4.1.68 - 6-alpha-L-fucosyltransferase, ec:2.4.1.149 - beta-1,3-N-acetylglucosaminyltransferase, ec:2.8.2.21 - sulfotransferase
Glycosaminoglycan biosynthesis - chondroitin sulfate / dermatan sulfate	9	16	map00532	ec:2.4.1.226 - 3-beta-glucuronosyltransferase, ec:2.4.1.174 - 4-beta-N-acetylgalactosaminyltransferase, ec:2.4.1.135 - 3-beta-glucuronosyltransferase, ec:2.4.1.175 - 4-beta-N-acetylgalactosaminyltransferase, ec:2.4.2.26 - xylosyltransferase, ec:2.4.1.133 - 4-beta-galactosyltransferase, ec:2.8.2.5 - 4-sulfotransferase, ec:2.8.2.33 - 4-sulfate 6-O-sulfotransferase, ec:2.4.1.134 - 3-beta-galactosylt…
Vitamin B6 metabolism	11	15	map00750	ec:3.1.3.74 - phosphatase, ec:1.1.1.290 - dehydrogenase, ec:1.2.1.72 - dehydrogenase, ec:1.4.3.5 - 5'-phosphate synthase, ec:4.2.3.1 - synthase, ec:1.1.1.262 - dehydrogenase, ec:1.2.3.1 - oxidase, ec:2.6.99.2 - 5'-phosphate synthase, ec:2.7.1.35 - kinase, ec:4.3.3.6 - 5'-phosphate synthase (glutamine hydrolysing), ec:2.6.1.52 - transaminase
Phosphonate and phosphinate metabolism	9	15	map00440	ec:3.11.1.1 - hydrolase, ec:4.7.1.1 - 1-methylphosphonate 5-phosphate C-P-lyase, ec:2.7.8.1 - EPT, ec:2.7.8.2 - cholinephosphotransferase, ec:2.3.1.183 - acetyltransferase, ec:2.7.7.15 - cytidylyltransferase, ec:2.7.7.14 - cytidylyltransferase, ec:2.6.1.37 - transaminase, ec:2.7.8.37 - 1-methylphosphonate 5-triphosphate synthase
Dioxin degradation	6	15	map00621	ec:4.1.3.39 - aldolase, ec:4.2.1.80 - hydratase, ec:4.1.1.77 - decarboxylase, ec:4.5.1.1 - DDT-ase, ec:1.2.1.10 - dehydrogenase (acetylating), ec:1.13.11.39 - 1,2-dioxygenase
Glycosaminoglycan biosynthesis - heparan sulfate / heparin	10	14	map00534	ec:2.4.1.225 - 4-beta-glucuronosyltransferase, ec:2.8.2.23 - sulfate]-glucosamine 3-sulfotransferase 1, ec:2.4.1.135 - 3-beta-glucuronosyltransferase, ec:5.1.3.17 - 5-epimerase, ec:2.4.1.223 - 4-alpha-N-acetylglucosaminyltransferase, ec:2.4.2.26 - xylosyltransferase, ec:2.4.1.133 - 4-beta-galactosyltransferase, ec:2.4.1.224 - 4-alpha-N-acetylglucosaminyltransferase, ec:2.8.2.30 - sulfate]-glucosa…
Valine, leucine and isoleucine biosynthesis	10	14	map00290	ec:2.6.1.66 - transaminase, ec:1.1.1.85 - dehydrogenase, ec:4.2.1.33 - dehydratase, ec:4.2.1.9 - dehydratase, ec:4.3.1.19 - ammonia-lyase, ec:2.6.1.42 - transaminase, ec:1.1.1.86 - reductoisomerase (NADP+), ec:2.6.1.6 - transaminase, ec:2.3.3.13 - synthase, ec:2.2.1.6 - synthase
Other types of O-glycan biosynthesis	5	13	map00514	ec:2.4.1.222 - 3-beta-N-acetylglucosaminyltransferase, ec:2.4.1.109 - mannosyltransferase, ec:2.4.99.1 - alpha-(2,6)-sialyltransferase, ec:2.4.1.221 - GDP-L-fucose:polypeptide fucosyltransferase, ec:2.4.1.66 - glucosyltransferase
Synthesis and degradation of ketone bodies	5	13	map00072	ec:1.1.1.30 - dehydrogenase, ec:2.3.3.10 - synthase, ec:2.8.3.5 - CoA-transferase, ec:2.3.1.9 - C-acetyltransferase, ec:4.1.3.4 - lyase
C5-Branched dibasic acid metabolism	4	12	map00660	ec:1.1.1.85 - dehydrogenase, ec:2.2.1.6 - synthase, ec:6.2.1.5 - ligase (ADP-forming), ec:4.1.1.5 - decarboxylase
Ethylbenzene degradation	1	12	map00642	ec:2.3.1.16 - C-acyltransferase
Human cytomegalovirus infection	1	12	map05163	ec:2.7.1.153 - 3-kinase
Human immunodeficiency virus 1 infection	1	12	map05170	ec:2.7.1.153 - 3-kinase
Human papillomavirus infection	1	12	map05165	ec:2.7.1.153 - 3-kinase
PI3K-Akt signaling pathway	1	12	map04151	ec:2.7.1.153 - 3-kinase
Styrene degradation	6	11	map00643	ec:5.2.1.2 - isomerase, ec:3.7.1.2 - beta-diketonase, ec:3.5.1.4 - acylamidase, ec:1.13.11.5 - 1,2-dioxygenase, ec:1.2.1.39 - dehydrogenase, ec:1.13.11.2 - 2,3-dioxygenase
Mannose type O-glycan biosynthesis	3	11	map00515	ec:2.4.1.135 - 3-beta-glucuronosyltransferase, ec:2.4.1.109 - mannosyltransferase, ec:2.7.7.40 - cytidylyltransferase
Neomycin, kanamycin and gentamicin biosynthesis	2	11	map00524	ec:2.7.1.1 - hexokinase type IV glucokinase, ec:2.7.1.2 - glucokinase (phosphorylating)
Glycosphingolipid biosynthesis - lacto and neolacto series	6	10	map00601	ec:2.4.1.86 - beta-(1,3)-galactosyltransferase, ec:2.4.1.206 - 1,3-N-acetyl-beta-D-glucosaminyltransferase, ec:2.4.1.65 - 4-alpha-L-fucosyltransferase, ec:2.4.1.149 - beta-1,3-N-acetylglucosaminyltransferase, ec:2.4.1.228 - 4-alpha-galactosyltransferase, ec:2.4.1.69 - 1 galactoside alpha-(1,2)-fucosyltransferase
Lipopolysaccharide biosynthesis	9	9	map00540	ec:2.3.1.129 - O-acyltransferase, ec:2.7.7.38 - cytidylyltransferase, ec:3.5.1.108 - deacetylase, ec:3.1.3.45 - ec:3.1.3.45 3-deoxy-manno-octulosonate-8-phosphatase, ec:2.5.1.55 - synthase, ec:2.4.2.43 - IVA 4-amino-4-deoxy-L-arabinosyltransferase, ec:5.3.1.13 - isomerase, ec:5.1.3.20 - 6-epimerase, ec:2.4.1.182 - synthase
Glycosylphosphatidylinositol (GPI)-anchor biosynthesis	2	9	map00563	ec:3.5.1.89 - deacetylase, ec:2.4.1.198 - N-acetylglucosaminyltransferase
D-Alanine metabolism	2	8	map00473	ec:5.1.1.1 - racemase, ec:6.3.2.4 - ligase
Biosynthesis of ansamycins	1	8	map01051	ec:2.2.1.1 - glycolaldehydetransferase
Monobactam biosynthesis	5	7	map00261	ec:1.2.1.11 - dehydrogenase, ec:2.7.2.4 - kinase, ec:2.7.7.4 - adenylyltransferase, ec:1.17.1.8 - reductase, ec:4.3.3.7 - synthase
Xylene degradation	6	6	map00622	ec:4.1.3.39 - aldolase, ec:1.2.1.28 - dehydrogenase (NAD+), ec:4.2.1.80 - hydratase, ec:4.1.1.77 - decarboxylase, ec:1.2.1.10 - dehydrogenase (acetylating), ec:1.13.11.2 - 2,3-dioxygenase
Flavone and flavonol biosynthesis	3	6	map00944	ec:3.2.1.31 - beta-glucuronide glucuronohydrolase glucuronidase, ec:1.14.14.81 - 3',5'-hydroxylase, ec:1.14.14.82 - 3'-monooxygenase
Bisphenol degradation	1	6	map00363	ec:3.1.1.2 - A-esterase
Melanogenesis	1	6	map04916	ec:5.3.3.12 - isomerase
Biosynthesis of siderophore group nonribosomal peptides	5	5	map01053	ec:1.3.1.28 - dehydrogenase, ec:6.3.2.14 - synthase, ec:3.3.2.1 - 2,3-dihydro-2,3-dihydroxybenzoate synthase, ec:2.7.7.58 - synthase, ec:5.4.4.2 - synthase
D-Arginine and D-ornithine metabolism	5	5	map00472	ec:5.4.3.5 - 4,5-aminomutase, ec:5.1.1.10 - racemase, ec:1.4.1.12 - dehydrogenase, ec:1.4.3.3 - oxidase, ec:5.1.1.12 - racemase
Primary bile acid biosynthesis	5	5	map00120	ec:4.2.1.107 - hydratase, ec:1.3.1.3 - 5beta-reductase, ec:1.17.99.3 - 24-hydroxylase, ec:2.3.1.176 - C-acyltransferase, ec:5.1.99.4 - racemase
Lipoic acid metabolism	2	5	map00785	ec:2.8.1.8 - synthase, ec:2.3.1.181 - transferase
Glucosinolate biosynthesis	1	5	map00966	ec:2.6.1.42 - transaminase
Zeatin biosynthesis	1	5	map00908	ec:2.5.1.75 - dimethylallyltransferase
Chlorocyclohexane and chlorobenzene degradation	4	4	map00361	ec:3.1.1.45 - maleylacetate enol-lactonase, ec:3.8.1.5 - dehalogenase, ec:1.13.11.39 - 1,2-dioxygenase, ec:1.13.11.2 - 2,3-dioxygenase
Carbapenem biosynthesis	2	4	map00332	ec:1.2.1.41 - dehydrogenase, ec:2.7.2.11 - 5-kinase
Atrazine degradation	4	3	map00791	ec:6.3.4.6 - carboxylase, ec:3.5.1.54 - hydrolase, ec:3.5.1.5 - ec:3.5.1.5 urease, ec:3.5.1.84 - amidohydrolase
Flavonoid biosynthesis	4	3	map00941	ec:1.1.1.234 - 4-reductase, ec:1.14.14.81 - 3',5'-hydroxylase, ec:1.14.14.82 - 3'-monooxygenase, ec:1.1.1.219 - 4-reductase
Penicillin and cephalosporin biosynthesis	3	3	map00311	ec:3.1.1.41 - deacetylase, ec:3.5.2.6 - penicillinase, ec:1.4.3.3 - oxidase
Polyketide sugar unit biosynthesis	3	3	map00523	ec:4.2.1.46 - 4,6-dehydratase, ec:1.1.1.133 - reductase, ec:2.7.7.24 - thymidylyltransferase
Secondary bile acid biosynthesis	1	3	map00121	ec:1.1.1.201 - dehydrogenase (NADP+)
Acarbose and validamycin biosynthesis	2	2	map00525	ec:4.2.1.46 - 4,6-dehydratase, ec:2.7.7.24 - thymidylyltransferase
Aflatoxin biosynthesis	2	2	map00254	ec:6.4.1.2 - carboxylase, ec:1.1.1.353 - hemiacetal acetate reductase
Betalain biosynthesis	2	2	map00965	ec:4.1.1.28 - decarboxylase, ec:1.14.18.1 - monophenol monooxygenase
Biosynthesis of secondary metabolites - unclassified	2	2	map00999	ec:6.2.1.12 - ligase, ec:5.1.1.12 - racemase
Sesquiterpenoid and triterpenoid biosynthesis	2	2	map00909	ec:2.5.1.21 - synthase, ec:1.14.14.17 - monooxygenase
Arabinogalactan biosynthesis - Mycobacterium	1	1	map00572	ec:2.4.1.289 - L-rhamnosyltransferase
beta-Lactam resistance	1	1	map01501	ec:3.5.2.6 - penicillinase
Biosynthesis of secondary metabolites - other antibiotics	1	1	map00998	ec:2.3.1.30 - O-acetyltransferase
Biosynthesis of vancomycin group antibiotics	1	1	map01055	ec:4.2.1.46 - 4,6-dehydratase
Brassinosteroid biosynthesis	1	1	map00905	ec:1.3.1.22 - 4-dehydrogenase (NADP+)
Carotenoid biosynthesis	1	1	map00906	ec:2.5.1.32 - synthase
Fluorobenzoate degradation	1	1	map00364	ec:3.1.1.45 - maleylacetate enol-lactonase
Indole alkaloid biosynthesis	1	1	map00901	ec:4.3.3.2 - synthase
Lipoarabinomannan (LAM) biosynthesis	1	1	map00571	ec:2.4.1.345 - alpha-mannosyltransferase
Monoterpenoid biosynthesis	1	1	map00902	ec:1.1.1.324 - dehydrogenase
Naphthalene degradation	1	1	map00626	ec:1.1.1.1 - dehydrogenase
Phenazine biosynthesis	1	1	map00405	ec:4.1.3.27 - synthase
Photosynthesis	1	1	map00195	ec:1.18.1.2 - reductase
Puromycin biosynthesis	1	1	map00231	ec:2.1.1.38 - O-methyltransferase

## Sheet: Figure S1. GO terms
		Figure S1. Gene Ontology (GO) level distribution of 37387 transcripts in the L. hesperus ovarian transcriptome assessed for term abundance using Blast2GO. Each transcript falls into one or more of the three major categories of biological processes (blue bars), cellular components (grey bars), and molecular function (red bars).

## Sheet: Figure S2. Pathways
	Figure S2. Identification of genes assigned to the purine metabolism (A) and thiamine metabolism (B) pathways in the L. hesperus ovarian transcriptome. Colored boxes represent pathway genes overrepresented in the transcriptome.
